# Supplementary material for: Theoretical study of the stability, structure, and optical spectra of small silver clusters and their formation using density functional theory
Source: Royal Society of Chemistry journal article supplement (doi:10.1039/d1cp04070g), 2021-01-01
Supplement: d1cp04070g1.pdf [file d1cp04070g1.pdf]

Theoretical Study of the Stability, Structure, and Optical Spectra of Small Silver Clusters and Their  
Formation Using Density Functional Theory

*Mohsen Farshad, Duwage C. Perera, and Jayendran C. Rasaiah\**

Department of Chemistry, University of Maine, Orono, Maine 04469, United States

**Supporting Information**

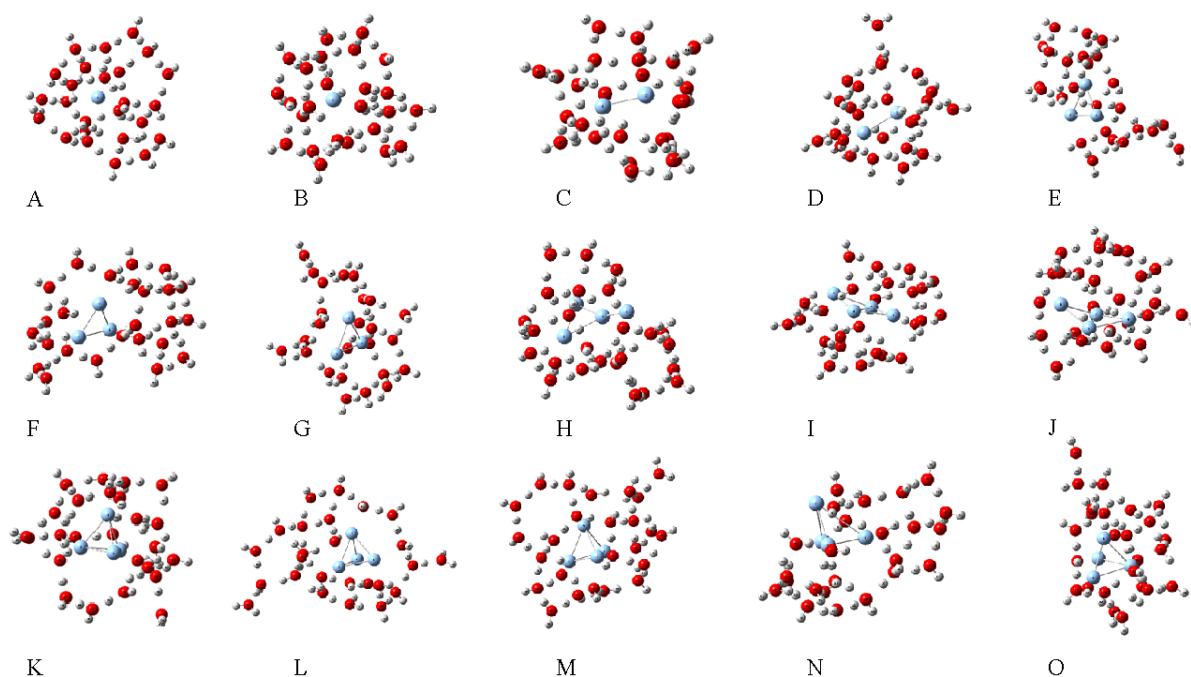

Figure S1. Optimized structures of initial (A) Ag, (B)  $\text{Ag}^+$ , (C)  $\text{Ag}_2$ , (D)  $\text{Ag}_2^+$ , (E)  $\text{Ag}_3$ , (F)  $\text{Ag}_3^+$ , (G)  $\text{Ag}_3^{2+}$ , (H)  $\text{Ag}_4$  planar, (I)  $\text{Ag}_4$  tetrahedral, (J)  $\text{Ag}_4^+$  planar, (K)  $\text{Ag}_4^+$  tetrahedral, (L)  $\text{Ag}_4^{2+}$  planar, (M)  $\text{Ag}_4^{2+}$  tetrahedral, (N)  $\text{Ag}_4^{3+}$  planar, and (O)  $\text{Ag}_4^{3+}$  tetrahedral configurations with 25 explicit water molecules around each species using BP86/LANL2DZ level of theory in Gaussian 16 software. Ag, O, and H atoms are represented using light blue, red, and grey colors respectively.

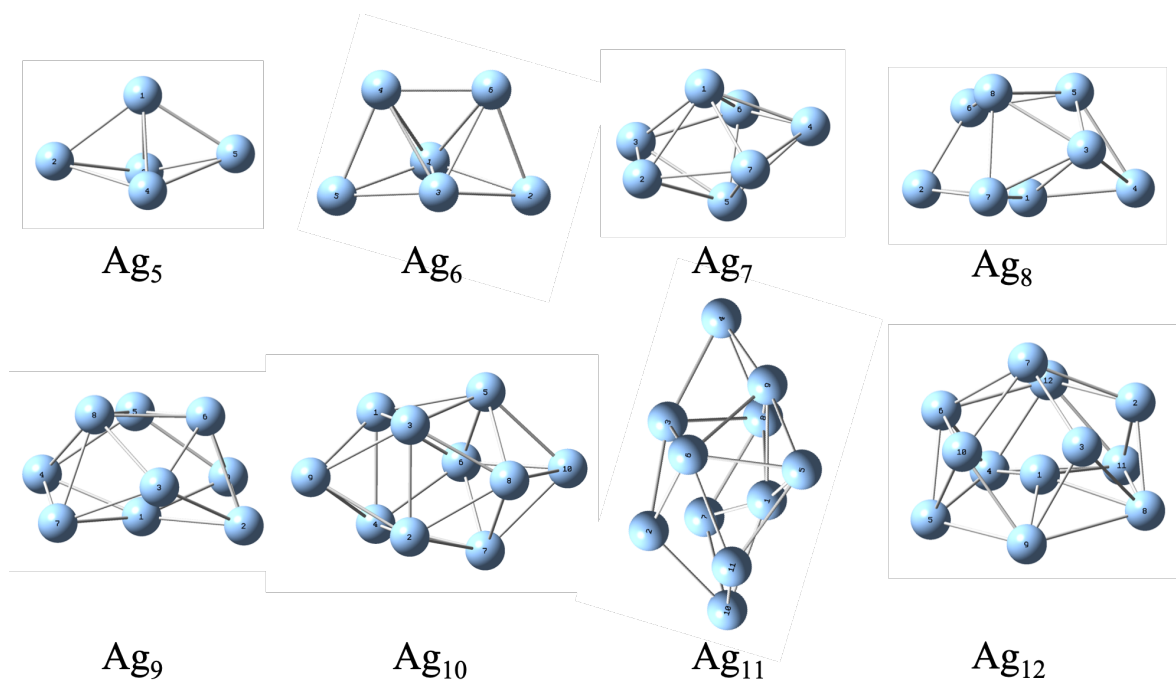

Figure S2. Optimized structures of  $\text{Ag}_5$  to  $\text{Ag}_{12}$  in gas phase using BP86/LANL2DZ level of theory in Gaussian 16 software.

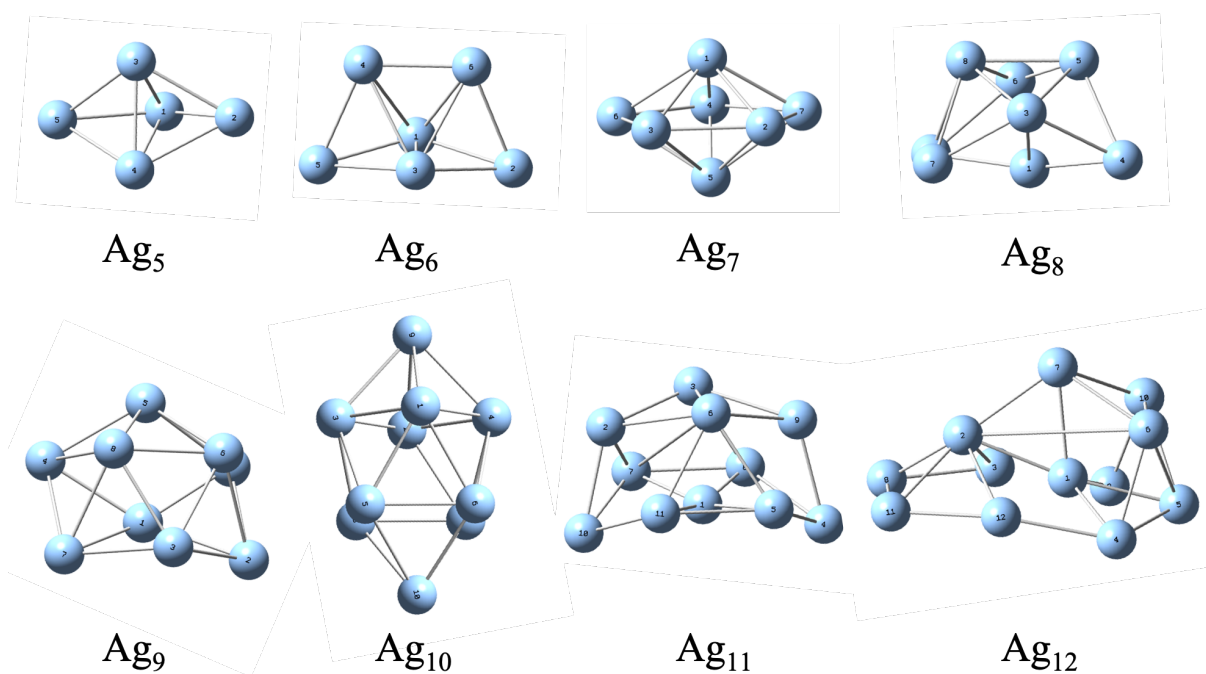

Figure S3. Optimized structures of  $\text{Ag}_5$  to  $\text{Ag}_{12}$  in implicit aqueous solution using BP86/LANL2DZ level of theory in Gaussian 16 software.

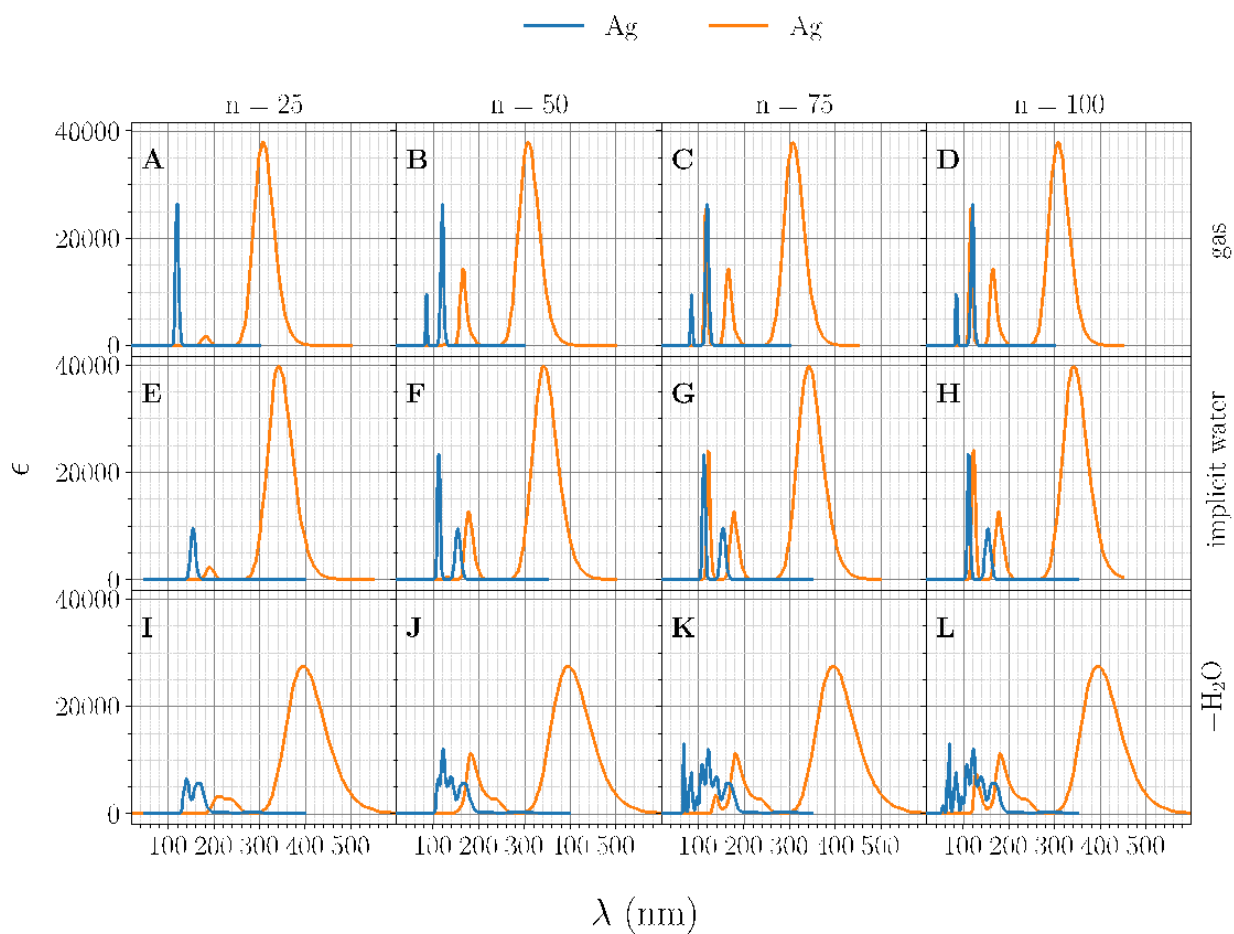

Figure S4. Absorption spectra of  $Ag^+$  and  $Ag$  with 25, 50, 75, and 100 excited electronic states in gas phase (A-D) in aqueous phase (E-H), and spectra of  $AgH_2O^+$  and  $AgH_2O$  (I-J) using TDDFT at the BP86/LANL2DZ level of theory.

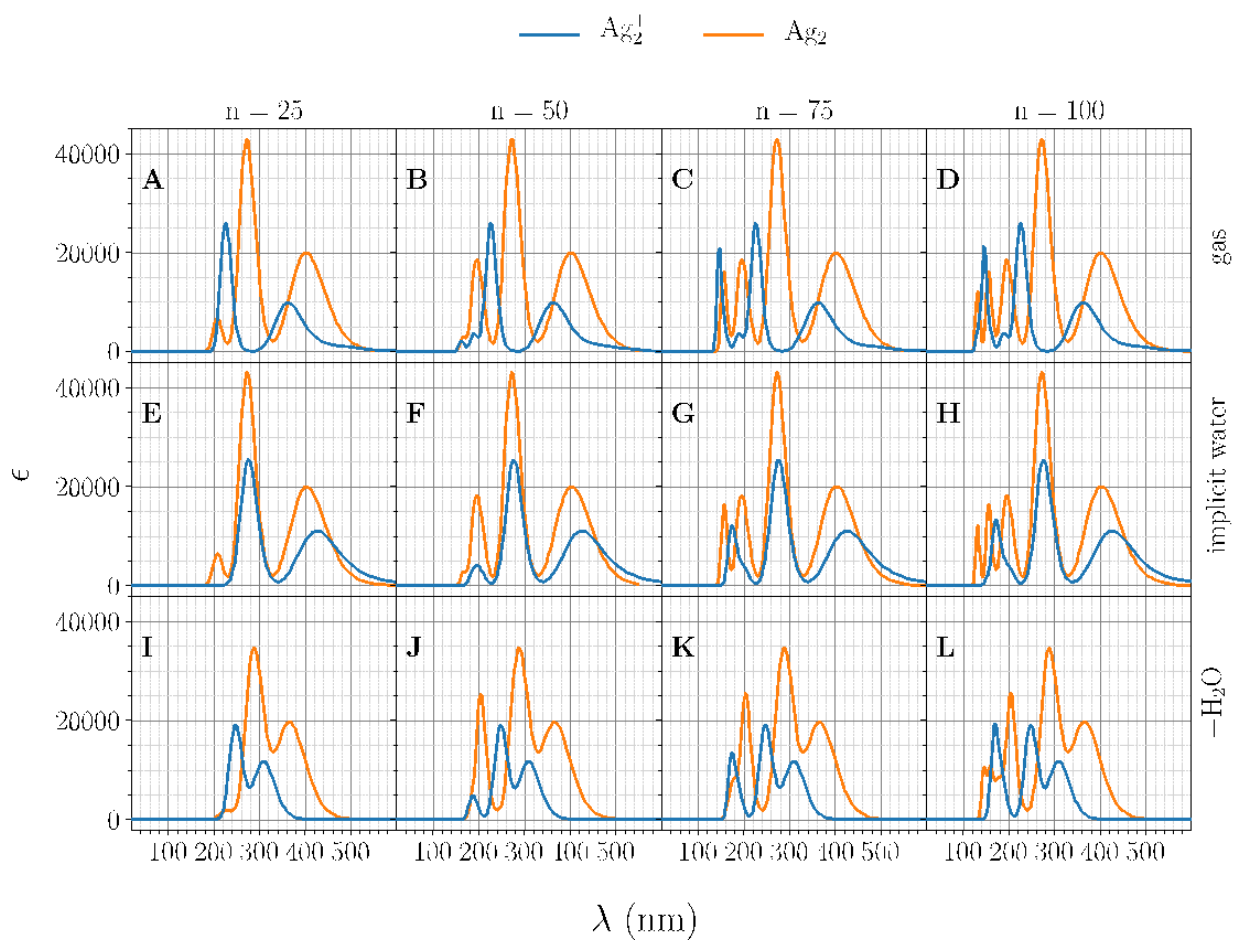

Figure S5. Absorption spectra of  $Ag_2^+$  and  $Ag_2$  with 25, 50, 75, and 100 excited electronic states in gas phase (A-D) in aqueous phase (E-H), and spectra of  $Ag_2(H_2O)_2^+$  and  $Ag_2(H_2O)_2$  (I-J) using TDDFT at the BP86/LANL2DZ level of theory.

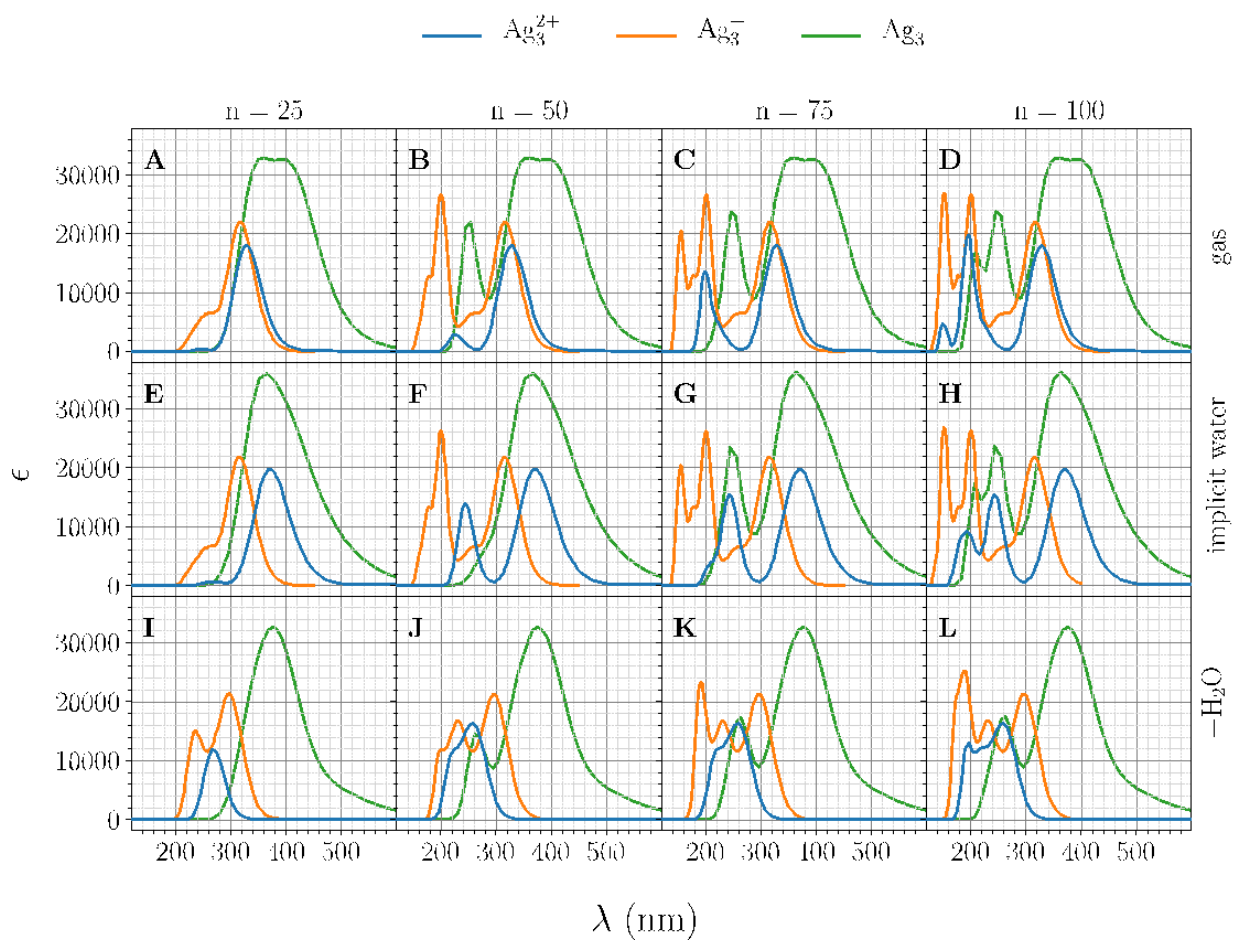

Figure S6. Absorption spectra of  $\text{Ag}_3^{2+}$ ,  $\text{Ag}_3^+$ , and  $\text{Ag}_3$  with 25, 50, 75, and 100 excited electronic states in gas phase (A-D) in aqueous phase (E-H), and spectra of  $\text{Ag}_3(\text{H}_2\text{O})_3^+$  and  $\text{Ag}_3(\text{H}_2\text{O})_3$  (I-J) using TDDFT at the BP86/LANL2DZ level of theory.

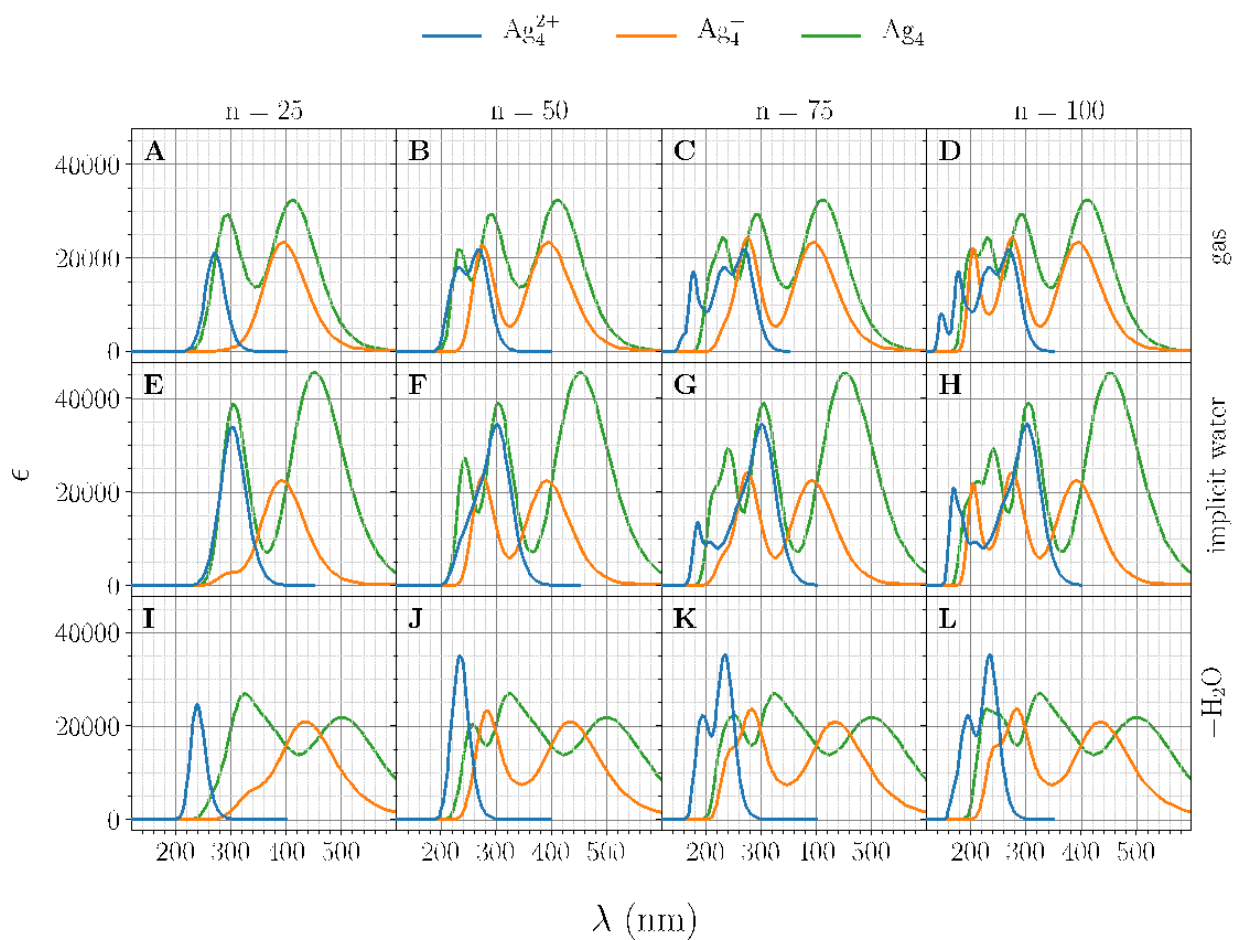

Figure S7. Absorption spectra of  $\text{Ag}_4^{2+}$ ,  $\text{Ag}_4^+$ , and  $\text{Ag}_4$  with 25, 50, 75, and 100 excited electronic states in gas phase (A-D) in aqueous phase (E-H), and spectra of  $\text{Ag}_4(\text{H}_2\text{O})_4^+$  and  $\text{Ag}_4(\text{H}_2\text{O})_4$  (I-J) using TDDFT at the BP86/LANL2DZ level of theory.
